# Supplementary material for: Tuning the magnetic properties of FeCo by pulsed DC magnetron sputtering
Source: Royal Society of Chemistry journal article supplement (doi:10.1039/c4ce01112k), 2014-01-01
Supplement: c4ce01112k1.pdf [file c4ce01112k1.pdf]

## Supplementary Information

Title: Tuning the magnetic properties of FeCo with pulsed DC magnetron sputtering

Authors: M. Abuín, L. Pérez, A. Mascaraque and M. Maicas

1) Schematic of the sputtering system:

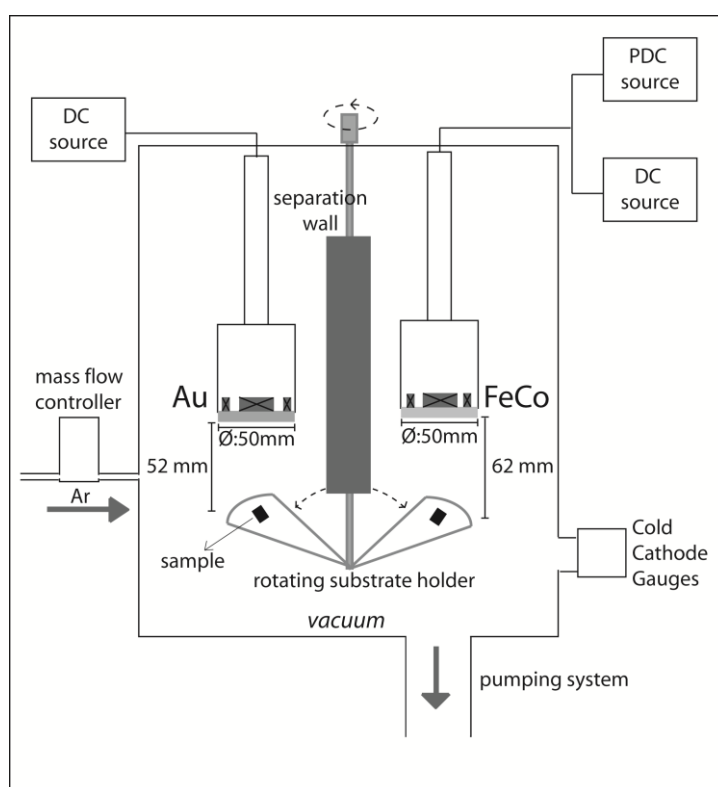

This is the schematic of the sputtering system. FeCo magnetron can use either the DC or PDC source. Sample is placed in front of the appropriate magnetron by means of a rotating device. Ar flux is determined by a mass flow controller. Target to substrate distances are specified in the figure.
